# Supplementary material for: Evaluation of Climate Change Impacts on the Global Distribution of the Calliphorid Fly Chrysomya albiceps Using GIS
Source: MDPI journal article supplement (doi:10.3390/d14070578), 2022-07-20
Supplement: s1 [file s1]

| species   | Lat.     | Long.    |
|-----------|----------|----------|
| chrysomya | 35.19115 | 25.43429 |
| chrysomya | 46.98322 | 32.00076 |
| chrysomya | 42.33686 | 13.45353 |
| chrysomya | 47.59805 | 18.97555 |
| chrysomya | 42.19431 | 2.879927 |
| chrysomya | 43.09758 | 16.63282 |
| chrysomya | 41.79332 | 1.633125 |
| chrysomya | 43.11469 | 16.69492 |
| chrysomya | 36.98319 | -3.11745 |
| chrysomya | 47.0057  | 32.02136 |
| chrysomya | 43.07267 | 16.68505 |
| chrysomya | 40.23033 | -7.84558 |
| chrysomya | 37.03584 | -3.76199 |
| chrysomya | 46.87364 | 15.8562  |
| chrysomya | 47.57312 | 21.62385 |
| chrysomya | 38.91917 | -6.95715 |
| chrysomya | 43.09773 | 16.6249  |
| chrysomya | 40.93102 | 0.208458 |
| chrysomya | 36.97702 | -3.12013 |
| chrysomya | 43.28249 | 17.02872 |
| chrysomya | 50.00691 | 21.99403 |
| chrysomya | 43.00037 | 16.74914 |
| chrysomya | 36.58053 | -6.20678 |
| chrysomya | 38.68    | 16.1     |
| chrysomya | -0.47    | -77.89   |
| chrysomya | -4.17    | -80.43   |
| chrysomya | -33.99   | 18.65    |
| chrysomya | 44.69    | 11.09    |
| chrysomya | -33.99   | 18.65    |
| chrysomya | 38.68    | 16.1     |
| chrysomya | -4.03    | -79.84   |
| chrysomya | -4.03    | -79.84   |
| chrysomya | 44.69    | 11.09    |
| chrysomya | -4.17    | -80.43   |
| chrysomya | -4.03    | -79.84   |
| chrysomya | 18.25    | 42.51    |
| chrysomya | 38.68    | 16.1     |
| chrysomya | -33.99   | 18.65    |
| chrysomya | 6.29     | -75.61   |
| chrysomya | -20.68   | -56.86   |
| chrysomya | -19.77   | -55.23   |
| chrysomya | -19.77   | -55.23   |
| chrysomya | -20.68   | -56.86   |

|           |         |         |
|-----------|---------|---------|
| chrysomya | -20.68  | -56.86  |
| chrysomya | -20.68  | -56.86  |
| chrysomya | -20.68  | -56.86  |
| chrysomya | -19.78  | -55.24  |
| chrysomya | -19.78  | -55.24  |
| chrysomya | 28.28   | 36.35   |
| chrysomya | 24.44   | 46.33   |
| chrysomya | 17.81   | 42.37   |
| chrysomya | 30.59   | 41.23   |
| chrysomya | 26.13   | 50.11   |
| chrysomya | 26.92   | 44.2    |
| chrysomya | 44.4528 | 26.0844 |
| chrysomya | 31.33   | 76.75   |
| chrysomya | 50.81   | 4.67    |
| chrysomya | 44.45   | 26.08   |
| chrysomya | 46.31   | 3.29    |
| chrysomya | 46.31   | 3.29    |
| chrysomya | 46.31   | 3.29    |
| chrysomya | 49.11   | 7.07    |
| chrysomya | 46.31   | 3.29    |
| chrysomya | 46.31   | 3.29    |
| chrysomya | 40.72   | -8.57   |
| chrysomya | 41.58   | -6.91   |
| chrysomya | -33.99  | 18.65   |
| chrysomya | -33.99  | 18.65   |
| chrysomya | -0.51   | -78.58  |
| chrysomya | -33.99  | 18.65   |
| chrysomya | -4.17   | -80.43  |
| chrysomya | 11.16   | -74.14  |
| chrysomya | -4.22   | -69.94  |
| chrysomya | -33.99  | 18.65   |
| chrysomya | -4.17   | -80.43  |
| chrysomya | 11.16   | -74.14  |
| chrysomya | -4.17   | -80.43  |
| chrysomya | -4.17   | -80.43  |
| chrysomya | 3.54    | -73.39  |
| chrysomya | 4.64    | -74.08  |
| chrysomya | -4.17   | -80.43  |
| chrysomya | -4.22   | -69.94  |
| chrysomya | 6.29    | -75.61  |
| chrysomya | 3.54    | -73.39  |
| chrysomya | -4.17   | -80.43  |
| chrysomya | -4.17   | -80.43  |
| chrysomya | -4.17   | -80.43  |
| chrysomya | 4.64    | -74.08  |
| chrysomya | -4.03   | -79.84  |
| chrysomya | -19.78  | -55.24  |

|           |          |          |
|-----------|----------|----------|
| chrysomya | -19.78   | -55.24   |
| chrysomya | 38.76    | -9.16    |
| chrysomya | 28.2     | 112.98   |
| chrysomya | 35.05275 | 25.88161 |
| chrysomya | 38.76887 | -9.26492 |
| chrysomya | 35.75486 | 27.21047 |
| chrysomya | -28.4301 | 26.22212 |
| chrysomya | 43.57293 | 1.895744 |
| chrysomya | -11.9689 | -76.7837 |
| chrysomya | 39.77448 | 3.129261 |
| chrysomya | 39.95059 | 4.044897 |
| chrysomya | 39.77448 | 3.129261 |
| chrysomya | 29.18462 | 47.81563 |
| chrysomya | -33.8963 | 20.26547 |
| chrysomya | 29.18464 | 47.81568 |
| chrysomya | 29.18469 | 47.81577 |
| chrysomya | 29.18458 | 47.81561 |
| chrysomya | 36.91287 | 3.912457 |
| chrysomya | 29.18463 | 47.81563 |
| chrysomya | 37.03501 | -8.95491 |
| chrysomya | 45.27155 | 0.169751 |
| chrysomya | 47.28964 | 39.68991 |
| chrysomya | 42.35792 | -2.47415 |
| chrysomya | 30.45116 | 47.8103  |
| chrysomya | 29.18462 | 47.81564 |
| chrysomya | 39.75065 | 30.53655 |
| chrysomya | 39.72365 | 30.66399 |
| chrysomya | 39.75065 | 30.53655 |
| chrysomya | 39.76711 | 30.52563 |
| chrysomya | 39.75065 | 30.53655 |
| chrysomya | 39.76711 | 30.52563 |
| chrysomya | 39.76711 | 30.52563 |
| chrysomya | 43.52661 | 16.48796 |
| chrysomya | 50.76905 | 2.532008 |
| chrysomya | 38.52066 | -8.90723 |
| chrysomya | 35.53272 | 24.05788 |
| chrysomya | 37.19948 | -1.91085 |
| chrysomya | 36.72875 | -2.80341 |
| chrysomya | 40.67126 | 22.93212 |
| chrysomya | 44.69126 | 8.038    |
| chrysomya | 37.03417 | -7.81306 |
| chrysomya | 38.01098 | 23.64316 |
| chrysomya | 37.18362 | -8.77567 |
| chrysomya | 39.17298 | 26.50653 |

[illegible]

|           |          |          |
|-----------|----------|----------|
| chrysomya | 11.23606 | -74.0714 |
| chrysomya | 11.23606 | -74.0714 |
| chrysomya | 11.23606 | -74.0714 |
| chrysomya | 11.15619 | -74.1355 |
| chrysomya | 11.23606 | -74.0714 |
| chrysomya | 11.25972 | -74.1593 |
| chrysomya | 11.23606 | -74.0714 |
| chrysomya | 11.23606 | -74.0714 |
| chrysomya | 11.25972 | -74.1593 |
| chrysomya | 11.25972 | -74.1593 |
| chrysomya | 11.23606 | -74.0714 |
| chrysomya | 11.25972 | -74.1593 |
| chrysomya | 11.23606 | -74.0714 |
| chrysomya | 11.25972 | -74.1593 |
| chrysomya | 11.23606 | -74.0714 |
| chrysomya | 11.23606 | -74.0714 |
| chrysomya | 11.23606 | -74.0714 |
| chrysomya | 11.25972 | -74.1593 |
| chrysomya | 11.23606 | -74.0714 |
| chrysomya | 11.23606 | -74.0714 |
| chrysomya | 11.23606 | -74.0714 |
| chrysomya | 11.25972 | -74.1593 |
| chrysomya | 11.23606 | -74.0714 |
| chrysomya | 11.25972 | -74.1593 |
| chrysomya | 11.25972 | -74.1593 |
| chrysomya | 11.23606 | -74.0714 |
| chrysomya | 11.23606 | -74.0714 |
| chrysomya | 11.23606 | -74.0714 |
| chrysomya | 11.13256 | -74.1188 |
| chrysomya | 11.23606 | -74.0714 |
| chrysomya | 11.25972 | -74.1593 |
| chrysomya | 11.23606 | -74.0714 |
| chrysomya | 11.23606 | -74.0714 |
| chrysomya | 11.23606 | -74.0714 |

|           |          |          |
|-----------|----------|----------|
| chrysomya | 11.25972 | -74.1593 |
| chrysomya | 11.25972 | -74.1593 |
| chrysomya | 11.23606 | -74.0714 |
| chrysomya | 11.13256 | -74.1188 |
| chrysomya | 11.25972 | -74.1593 |
| chrysomya | 11.23606 | -74.0714 |
| chrysomya | 11.25972 | -74.1593 |
| chrysomya | 11.25972 | -74.1593 |
| chrysomya | 11.13256 | -74.1188 |
| chrysomya | 11.13256 | -74.1188 |
| chrysomya | 11.23606 | -74.0714 |
| chrysomya | 11.13256 | -74.1188 |
| chrysomya | 11.25972 | -74.1593 |
| chrysomya | 11.13256 | -74.1188 |
| chrysomya | 11.25972 | -74.1593 |
| chrysomya | 11.25972 | -74.1593 |
| chrysomya | 11.13256 | -74.1188 |
| chrysomya | 11.13256 | -74.1188 |
| chrysomya | 11.25972 | -74.1593 |
| chrysomya | 11.13256 | -74.1188 |
| chrysomya | 11.13256 | -74.1188 |
| chrysomya | 11.25972 | -74.1593 |
| chrysomya | 11.13256 | -74.1188 |
| chrysomya | 11.25972 | -74.1593 |
| chrysomya | 11.13256 | -74.1188 |
| chrysomya | 11.25847 | -74.0758 |
| chrysomya | 11.13256 | -74.1188 |
| chrysomya | 11.25847 | -74.0758 |
| chrysomya | 11.13256 | -74.1188 |
| chrysomya | 11.13256 | -74.1188 |

|           |          |          |
|-----------|----------|----------|
| chrysomya | 11.13256 | -74.1188 |
| chrysomya | 11.22494 | -74.1853 |
| chrysomya | 11.25847 | -74.0758 |
| chrysomya | 11.22494 | -74.1853 |
| chrysomya | 11.25847 | -74.0758 |
| chrysomya | 11.22494 | -74.1853 |
| chrysomya | 11.25847 | -74.0758 |
| chrysomya | 11.22494 | -74.1853 |
| chrysomya | 11.25847 | -74.0758 |
| chrysomya | 11.22494 | -74.1853 |
| chrysomya | 11.25847 | -74.0758 |
| chrysomya | 11.25847 | -74.0758 |
| chrysomya | 11.22494 | -74.1853 |
| chrysomya | 11.25847 | -74.0758 |
| chrysomya | 11.25847 | -74.0758 |
| chrysomya | 11.22494 | -74.1853 |
| chrysomya | 11.22494 | -74.1853 |
| chrysomya | 11.25847 | -74.0758 |
| chrysomya | 11.22494 | -74.1853 |
| chrysomya | 11.25847 | -74.0758 |
| chrysomya | 11.25847 | -74.0758 |
| chrysomya | 11.22494 | -74.1853 |
| chrysomya | 11.25847 | -74.0758 |
| chrysomya | 11.25847 | -74.0758 |
| chrysomya | 11.22494 | -74.1853 |
| chrysomya | 11.22494 | -74.1853 |
| chrysomya | 11.25847 | -74.0758 |
| chrysomya | 11.25847 | -74.0758 |
| chrysomya | 11.25847 | -74.0758 |
| chrysomya | 11.22494 | -74.1853 |
| chrysomya | 11.22494 | -74.1853 |
| chrysomya | 11.25847 | -74.0758 |
| chrysomya | 11.22494 | -74.1853 |
| chrysomya | 11.25847 | -74.0758 |
| chrysomya | 11.25847 | -74.0758 |
| chrysomya | 11.22494 | -74.1853 |

|           |          |          |
|-----------|----------|----------|
| chrysomya | 11.22494 | -74.1853 |
| chrysomya | 11.25847 | -74.0758 |
| chrysomya | 11.25847 | -74.0758 |
| chrysomya | 11.22494 | -74.1853 |
| chrysomya | 11.22494 | -74.1853 |
| chrysomya | 11.22494 | -74.1853 |
| chrysomya | 11.25847 | -74.0758 |
| chrysomya | 11.25847 | -74.0758 |
| chrysomya | 11.22494 | -74.1853 |
| chrysomya | 11.23606 | -74.0714 |
| chrysomya | 11.22494 | -74.1853 |
| chrysomya | 11.25847 | -74.0758 |
| chrysomya | 11.25847 | -74.0758 |
| chrysomya | 11.23606 | -74.0714 |
| chrysomya | 11.25847 | -74.0758 |
| chrysomya | 11.23606 | -74.0714 |
| chrysomya | 11.22494 | -74.1853 |
| chrysomya | 11.23606 | -74.0714 |
| chrysomya | 11.22494 | -74.1853 |
| chrysomya | 11.23606 | -74.0714 |
| chrysomya | 11.25847 | -74.0758 |
| chrysomya | 11.22494 | -74.1853 |
| chrysomya | 11.23606 | -74.0714 |
| chrysomya | 11.23606 | -74.0714 |
| chrysomya | 11.22494 | -74.1853 |
| chrysomya | 11.25847 | -74.0758 |
| chrysomya | 11.23606 | -74.0714 |
| chrysomya | 11.22494 | -74.1853 |
| chrysomya | 11.23606 | -74.0714 |
| chrysomya | 11.23606 | -74.0714 |
| chrysomya | 11.22494 | -74.1853 |
| chrysomya | 11.23606 | -74.0714 |
| chrysomya | 11.23606 | -74.0714 |
| chrysomya | 11.22494 | -74.1853 |
| chrysomya | 11.25847 | -74.0758 |
| chrysomya | 11.25847 | -74.0758 |
| chrysomya | 11.25847 | -74.0758 |
| chrysomya | 11.22494 | -74.1853 |
| chrysomya | 11.25847 | -74.0758 |
| chrysomya | 11.22494 | -74.1853 |
| chrysomya | 11.22494 | -74.1853 |
| chrysomya | 11.25847 | -74.0758 |
| chrysomya | 11.25847 | -74.0758 |
| chrysomya | 11.22494 | -74.1853 |
| chrysomya | 11.25847 | -74.0758 |
| chrysomya | 11.25847 | -74.0758 |
| chrysomya | 11.22494 | -74.1853 |
| chrysomya | 11.25847 | -74.0758 |
| chrysomya | 11.25847 | -74.0758 |
| chrysomya | 11.22494 | -74.1853 |
| chrysomya | 11.22494 | -74.1853 |



|           |          |          |
|-----------|----------|----------|
| chrysomya | 11.25847 | -74.0758 |
| chrysomya | 11.22494 | -74.1853 |
| chrysomya | 11.25847 | -74.0758 |
| chrysomya | 11.25847 | -74.0758 |
| chrysomya | 11.22494 | -74.1853 |
| chrysomya | 11.22494 | -74.1853 |
| chrysomya | 11.22494 | -74.1853 |
| chrysomya | 11.25847 | -74.0758 |
| chrysomya | 11.22494 | -74.1853 |
| chrysomya | 11.25847 | -74.0758 |
| chrysomya | 11.25847 | -74.0758 |
| chrysomya | 11.22494 | -74.1853 |
| chrysomya | 11.22494 | -74.1853 |
| chrysomya | 11.23606 | -74.0714 |
| chrysomya | 11.23606 | -74.0714 |
| chrysomya | 11.22494 | -74.1853 |
| chrysomya | 11.23606 | -74.0714 |
| chrysomya | 11.22494 | -74.1853 |
| chrysomya | 11.22494 | -74.1853 |
| chrysomya | 11.23606 | -74.0714 |
| chrysomya | 11.22494 | -74.1853 |
| chrysomya | 11.23606 | -74.0714 |
| chrysomya | 11.22494 | -74.1853 |
| chrysomya | 11.22494 | -74.1853 |
| chrysomya | 11.22494 | -74.1853 |
| chrysomya | 11.23606 | -74.0714 |
| chrysomya | 11.22494 | -74.1853 |
| chrysomya | 11.22494 | -74.1853 |
| chrysomya | 11.22494 | -74.1853 |
| chrysomya | 11.23606 | -74.0714 |
| chrysomya | 11.22494 | -74.1853 |
| chrysomya | 11.22494 | -74.1853 |
| chrysomya | 11.23606 | -74.0714 |
| chrysomya | 11.25847 | -74.0758 |
| chrysomya | 11.23606 | -74.0714 |
| chrysomya | 11.23606 | -74.0714 |
| chrysomya | 11.22494 | -74.1853 |
| chrysomya | 11.25847 | -74.0758 |
| chrysomya | 11.23606 | -74.0714 |
| chrysomya | 11.22494 | -74.1853 |
| chrysomya | 11.25847 | -74.0758 |
| chrysomya | 11.23606 | -74.0714 |
| chrysomya | 11.22494 | -74.1853 |
| chrysomya | 11.25847 | -74.0758 |
| chrysomya | 11.22494 | -74.1853 |
| chrysomya | 11.25847 | -74.0758 |

[illegible]

[illegible]

[illegible]

[illegible]

[illegible]

[illegible]

[illegible]



[illegible]

[illegible]

[illegible]

[illegible]

[illegible]

[illegible]

[illegible]

|           |          |          |
|-----------|----------|----------|
| chrysomya | 11.23606 | -74.0714 |
| chrysomya | 11.24847 | -74.0675 |
| chrysomya | 11.26528 | -74.1566 |
| chrysomya | 11.26528 | -74.1566 |
| chrysomya | 11.24847 | -74.0675 |
| chrysomya | 11.27067 | -74.1568 |
| chrysomya | 11.25847 | -74.0758 |
| chrysomya | 11.25847 | -74.0758 |
| chrysomya | 11.27067 | -74.1568 |
| chrysomya | 11.27067 | -74.1568 |
| chrysomya | 11.25847 | -74.0758 |
| chrysomya | 11.27067 | -74.1568 |
| chrysomya | 11.25847 | -74.0758 |
| chrysomya | 11.27067 | -74.1568 |
| chrysomya | 11.25847 | -74.0758 |
| chrysomya | 11.27067 | -74.1568 |
| chrysomya | 11.25847 | -74.0758 |



[illegible]

[illegible]

|           |          |          |
|-----------|----------|----------|
| chrysomya | 11.23606 | -74.0714 |
| chrysomya | 11.21192 | -74.1725 |
| chrysomya | 11.21192 | -74.1725 |
| chrysomya | 11.21192 | -74.1725 |
| chrysomya | 11.24847 | -74.0675 |
| chrysomya | 11.25847 | -74.0758 |
| chrysomya | 11.21192 | -74.1725 |
| chrysomya | 11.22163 | -74.1863 |
| chrysomya | 11.25847 | -74.0758 |
| chrysomya | 11.27308 | -74.1586 |
| chrysomya | 11.25847 | -74.0758 |
| chrysomya | 11.22163 | -74.1863 |
| chrysomya | 11.21192 | -74.1725 |
| chrysomya | 11.22163 | -74.1863 |
| chrysomya | 11.24847 | -74.0675 |
| chrysomya | 11.24847 | -74.0675 |
| chrysomya | 11.22163 | -74.1863 |
| chrysomya | 11.24847 | -74.0675 |
| chrysomya | 11.24847 | -74.0675 |
| chrysomya | 11.22163 | -74.1863 |
| chrysomya | 11.24847 | -74.0675 |
| chrysomya | 11.22163 | -74.1863 |
| chrysomya | 11.22163 | -74.1863 |
| chrysomya | 11.22163 | -74.1863 |

[illegible]

[illegible]

|                    |          |          |
|--------------------|----------|----------|
| chrysomya          | -21.3814 | 55.60132 |
| chrysomya          | 43.90119 | 0.32349  |
| chrysomya          | 43.78648 | -0.54132 |
| chrysomya          | 43.90119 | 0.32349  |
| chrysomya          | 43.78648 | -0.54132 |
| chrysomya          | 43.18182 | 5.64319  |
| chrysomya          | 43.18182 | 5.64319  |
| chrysomya          | 29.57267 | 34.94304 |
| chrysomya          | 40.723   | -8.5724  |
| chrysomya          | 41.5804  | -6.9106  |
| chrysomya          | 39.17572 | 26.50343 |
| chrysomya          | 29.13749 | 47.1007  |
| chrysomya          | 31.74602 | 35.05153 |
| chrysomya          | 47.6702  | 16.13287 |
| chrysomya          | 28.39851 | -14.1559 |
| chrysomya          | 28.42485 | -14.0571 |
| chrysomya          | 31.74602 | 35.05153 |
| chrysomya          | 31.74602 | 35.05153 |
| chrysomya          | 39.35508 | 16.24139 |
| chrysomya          | 36.74058 | 31.48579 |
| chrysomya          | 31.74602 | 35.05153 |
| chrysomya          | 31.74602 | 35.05153 |
| chrysomya          | 46.97503 | 31.99458 |
| chrysomya          | 46.97503 | 31.99458 |
| chrysomya          | 35.24919 | 26.26781 |
| chrysomya albiceps |          |          |
| chrysomya          | 43.6375  | 3.891667 |
| chrysomya          | 35.49753 | 23.71483 |
| chrysomya          | 38.79135 | 20.7185  |
| chrysomya          | 42.53014 | 3.0232   |
| chrysomya          | 39.65019 | -7.6744  |
| chrysomya          | 42.19451 | 2.880058 |
| chrysomya          | 42.33999 | 13.45125 |
| chrysomya          | 51.11928 | 3.552714 |
| chrysomya          | 37.98613 | 23.70737 |
| chrysomya albiceps |          |          |
| chrysomya          | -28.7116 | 28.93819 |
| chrysomya          | -28.7116 | 28.93819 |
| chrysomya          | -28.7116 | 28.93819 |
| chrysomya albiceps |          |          |
| chrysomya albiceps |          |          |
| chrysomya          | -33.1667 | 26.61667 |
| chrysomya          | -28.7116 | 28.93819 |
| chrysomya          | -28.75   | 31.9     |
| chrysomya albiceps |          |          |
| chrysomya          | -29.0167 | 30.41667 |
| chrysomya          | -28.7116 | 28.93819 |

|                    |          |          |
|--------------------|----------|----------|
| chrysomya          | -28.7116 | 28.93819 |
| chrysomya albiceps |          |          |
| chrysomya          | -22.4167 | 26.73333 |
| chrysomya          | -28.7116 | 28.93819 |
| chrysomya          | -28.7116 | 28.93819 |
| chrysomya          | -33.3    | 24.38333 |
| chrysomya          | -33.3    | 23.48333 |
| chrysomya          | -29.2833 | 31.45    |
| chrysomya          | -28      | 16.63333 |
| chrysomya          | -28.7116 | 28.93819 |
| chrysomya          | -28.2167 | 30.01667 |
| chrysomya          | -28.7116 | 28.93819 |
| chrysomya          | -22.3667 | 30.03333 |
| chrysomya          | -33.1667 | 26.61667 |
| chrysomya          | -33.1667 | 26.61667 |
| chrysomya          | -30.8167 | 27.91667 |
| chrysomya          | -25.7167 | 28.18333 |
| chrysomya          | -26.1422 | 28.08453 |
| chrysomya          | -29.0167 | 30.41667 |
| chrysomya          | -33.1667 | 26.61667 |
| chrysomya          | -29.85   | 29.2     |
| chrysomya          | -28.9242 | 29.13377 |
| chrysomya          | -28.3333 | 30.43333 |
| chrysomya          | -33.3    | 23.48333 |
| chrysomya          | -27.6333 | 32.15    |
| chrysomya          | -27.6333 | 32.15    |
| chrysomya          | -27      | 17.5     |
| chrysomya          | -32.45   | 20.6     |
| chrysomya          | -33.1667 | 26.61667 |
| chrysomya          | -33.3    | 23.48333 |
| chrysomya          | -32.45   | 20.6     |
| chrysomya          | -28.3026 | 27.94532 |
| chrysomya          | 36.77873 | 8.68735  |
| chrysomya          | -20.2    | 57.5     |
| chrysomya          | -8.6     | 35.28333 |
| chrysomya          | -5.1     | 38.63333 |
| chrysomya          | -8.6     | 35.28333 |
| chrysomya          | -20.2    | 57.5     |
| chrysomya          | -26.2    | 28.08333 |
| chrysomya          | -20.2    | 57.5     |
| chrysomya          | -20.2    | 57.5     |
| chrysomya          | -26.2    | 28.08333 |
| chrysomya albiceps |          |          |
| chrysomya          | -26.2    | 28.08333 |
| chrysomya          | 5.383333 | -2.46667 |
| chrysomya          | -29.7657 | 30.85236 |
| chrysomya          | -26.2    | 28.08333 |

|           |          |          |
|-----------|----------|----------|
| chrysomya | -26.2    | 28.08333 |
| chrysomya | -33.3    | 23.48333 |
| chrysomya | -33.3    | 26.53333 |
| chrysomya | -26.2    | 28.08333 |
| chrysomya | -0.33163 | 35.94494 |
| chrysomya | -33.3    | 23.48333 |
| chrysomya | -22.9833 | 27.93333 |
| chrysomya | -33.1667 | 26.61667 |
| chrysomya | -26.2    | 28.08333 |
| chrysomya | -33.1667 | 26.61667 |
| chrysomya | -29.8579 | 31.0292  |
| chrysomya | -33.3    | 23.48333 |
| chrysomya | -29.7657 | 30.85236 |
| chrysomya | -33.4337 | -70.5178 |
| chrysomya | -32.7664 | -71.3257 |
| chrysomya | 46.98322 | 32.00076 |
| chrysomya | 45.723   | 9.649358 |
| chrysomya | 45.39915 | 11.9395  |
| chrysomya | 37.04074 | -7.97745 |
| chrysomya | 39.49227 | -0.3556  |
| chrysomya | 47.66936 | 16.1323  |
| chrysomya | 47.66941 | 16.13232 |
| chrysomya | 29.1848  | 47.8157  |
| chrysomya | 38.08966 | 23.9765  |
| chrysomya | 39.05232 | -7.89056 |
| chrysomya | 40.63195 | 22.82881 |
| chrysomya | 46.307   | 3.287    |
| chrysomya | 50.81    | 4.67     |
| chrysomya | 46.307   | 3.287    |
| chrysomya | 49.114   | 7.072    |
| chrysomya | 30.9256  | 29.7755  |
| chrysomya | 28.28    | 36.35    |
| chrysomya | 44.4528  | 26.0844  |
| chrysomya | 26.13    | 50.11    |
| chrysomya | 30.59    | 41.23    |
| chrysomya | 26.92    | 44.2     |
| chrysomya | 24.44    | 46.33    |
| chrysomya | 17.81    | 42.37    |
| chrysomya | 31.33    | 76.75    |
| chrysomya | 44.4528  | 26.0844  |
| chrysomya | -4.167   | -80.4333 |
| chrysomya | -0.37312 | -78.1395 |
| chrysomya | -0.383   | -78.967  |
| chrysomya | -0.69533 | -77.8004 |



|           |          |          |
|-----------|----------|----------|
| chrysomya | -4.167   | -80.4333 |
| chrysomya | -0.99909 | -77.8366 |
| chrysomya | -4.167   | -80.4333 |
| chrysomya | -4.167   | -80.4333 |
| chrysomya | -4.032   | -79.842  |
| chrysomya | -4.032   | -79.842  |
| chrysomya | -4.167   | -80.4333 |
| chrysomya | -4.032   | -79.842  |
| chrysomya | -4.032   | -79.842  |
| chrysomya | -4.167   | -80.4333 |
| chrysomya | -0.46731 | -77.8927 |
| chrysomya | -0.69533 | -77.8004 |
| chrysomya | 38.756   | -9.159   |
| chrysomya | -33.991  | 18.651   |
| chrysomya | 49.211   | 16.617   |
| chrysomya | 48.1333  | 11.5667  |
| chrysomya | 49.689   | 17.126   |
| chrysomya | -31.4132 | -64.1882 |
| chrysomya | -31.4187 | -64.1892 |
| chrysomya | -31.4187 | -64.1892 |
| chrysomya | -31.3493 | -64.2499 |
| chrysomya | -31.3493 | -64.2499 |
| chrysomya | -31.4132 | -64.1882 |
| chrysomya | -31.4132 | -64.1882 |
| chrysomya | -31.4187 | -64.1892 |
| chrysomya | -31.4167 | -64.1833 |
| chrysomya | -31.4187 | -64.1892 |
| chrysomya | -31.3493 | -64.2499 |
| chrysomya | -31.3493 | -64.2499 |
| chrysomya | -31.3493 | -64.2499 |
| chrysomya | -31.4132 | -64.1882 |

|           |          |          |
|-----------|----------|----------|
| chrysomya | -31.4132 | -64.1882 |
| chrysomya | -31.4187 | -64.1892 |
| chrysomya | -31.3493 | -64.2499 |
| chrysomya | -31.4187 | -64.1892 |
| chrysomya | -31.3493 | -64.2499 |
| chrysomya | -31.4167 | -64.1833 |
| chrysomya | -31.4187 | -64.1892 |
| chrysomya | -31.3493 | -64.2499 |
| chrysomya | -31.4132 | -64.1882 |
| chrysomya | 37.82643 | -25.5853 |
| chrysomya | 37.68986 | -25.4745 |
| chrysomya | 37.73089 | -25.19   |
| chrysomya | 37.86852 | -25.3572 |
| chrysomya | 37.73763 | -25.7005 |
| chrysomya | 37.86513 | -25.1299 |
| chrysomya | 37.73824 | -25.7572 |
| chrysomya | 37.86772 | -25.3003 |
| chrysomya | 37.73563 | -25.5303 |
| chrysomya | 37.78068 | -25.5294 |
| chrysomya | 37.77843 | -25.3592 |
| chrysomya | 37.77996 | -25.4727 |
| chrysomya | 37.87399 | -25.8118 |
| chrysomya | 37.78268 | -25.6997 |
| chrysomya | 37.78137 | -25.5862 |
| chrysomya | 37.82009 | -25.131  |
| chrysomya | 37.73001 | -25.1333 |
| chrysomya | 37.82573 | -25.5285 |
| chrysomya | 37.86602 | -25.1867 |
| chrysomya | 37.91846 | -25.7542 |
| chrysomya | 37.91905 | -25.8111 |
| chrysomya | 37.8295  | -25.8693 |
| chrysomya | 37.69058 | -25.5312 |
| chrysomya | 37.73632 | -25.587  |
| chrysomya | 37.77763 | -25.3024 |
| chrysomya | 37.82098 | -25.1878 |
| chrysomya | 37.82835 | -25.7557 |
| chrysomya | 37.82709 | -25.6421 |
| chrysomya | 37.78204 | -25.643  |
| chrysomya | 37.77679 | -25.2456 |
| chrysomya | 37.82267 | -25.3014 |
| chrysomya | 37.82184 | -25.2446 |
| chrysomya | 37.82501 | -25.4717 |
| chrysomya | 37.82426 | -25.4149 |
| chrysomya | 37.73416 | -25.4169 |
| chrysomya | 37.8734  | -25.755  |
| chrysomya | 37.73491 | -25.4736 |
| chrysomya | 37.87279 | -25.6981 |

[illegible]

[illegible]

[illegible]

[illegible]

[illegible]

[illegible]



|           |          |          |
|-----------|----------|----------|
| chrysomya | -7.63611 | -50.7875 |
| chrysomya | -7.63611 | -50.7875 |
| chrysomya | -7.415   | -50.7386 |
| chrysomya | -7.63611 | -50.7875 |
| chrysomya | -7.63611 | -50.7875 |
| chrysomya | -7.63611 | -50.7875 |
| chrysomya | -7.11333 | -51.0547 |
| chrysomya | -7.63611 | -50.7875 |
| chrysomya | -7.00056 | -51.5122 |
| chrysomya | -7.58389 | -51.1175 |
| chrysomya | -7.58389 | -51.1175 |
| chrysomya | -30.687  | -67.501  |
| chrysomya | -34.6    | -58.796  |
| chrysomya | -34.6    | -58.796  |
| chrysomya | -34.6    | -58.796  |
| chrysomya | -28.02   | -58.04   |
| chrysomya | -28.02   | -58.04   |
| chrysomya | -28.02   | -58.04   |
| chrysomya | -28.03   | -58.04   |
| chrysomya | -28.03   | -58.04   |
| chrysomya | 31.3     | 73.05    |
| chrysomya | -0.507   | -78.576  |
| chrysomya | -0.507   | -78.576  |
| chrysomya | -19.7803 | -55.2415 |
| chrysomya | -19.7803 | -55.2415 |
| chrysomya | -19.7803 | -55.2415 |
| chrysomya | -19.7675 | -55.2276 |
| chrysomya | -20.6834 | -56.8623 |
| chrysomya | -19.7803 | -55.2415 |
| chrysomya | -19.7675 | -55.2276 |
| chrysomya | -20.6834 | -56.8623 |
| chrysomya | -20.3    | 57.58333 |
| chrysomya | -20.3    | 57.58333 |
| chrysomya | 5.383333 | -2.46667 |
| chrysomya | -8.6     | 35.28333 |
| chrysomya | -5.08333 | 32.83333 |
| chrysomya | -8.6     | 35.28333 |
| chrysomya | -9.11667 | 35.65    |
| chrysomya | 39.47189 | -0.37862 |
| chrysomya | 41.64859 | -0.88659 |
| chrysomya | 41.64859 | -0.88659 |
| chrysomya | 41.64859 | -0.88659 |
| chrysomya | 36.8625  | 10.19556 |
| chrysomya | 36.77722 | 8.6925   |

|           |          |          |
|-----------|----------|----------|
| chrysomya | 39.57751 | 2.65071  |
| chrysomya | 36.75583 | 10.11833 |
| chrysomya | -29.7833 | 30.83333 |
| chrysomya | -20.3    | 57.58333 |
| chrysomya | -20.3    | 57.58333 |
| chrysomya | -22.9833 | 27.93333 |
| chrysomya | -18.5    | 34.25    |
| chrysomya | -26.2    | 28.08333 |
| chrysomya | -26.2    | 28.08333 |
| chrysomya | -33.1667 | 26.61667 |
| chrysomya | -27.8833 | 31.55    |
| chrysomya | -26.2    | 28.08333 |
| chrysomya | -28.8333 | 28.63333 |
| chrysomya | -18.9167 | 47.51667 |
| chrysomya | -33.2667 | 26.48333 |
| chrysomya | -26.2    | 28.08333 |
| chrysomya | -26.2    | 28.08333 |
| chrysomya | -28.8333 | 28.63333 |
| chrysomya | -28.8333 | 28.63333 |
| chrysomya | -26.2    | 28.08333 |
| chrysomya | -28.8333 | 28.63333 |
| chrysomya | -26.2    | 28.08333 |
| chrysomya | -33.1167 | 26.66667 |
| chrysomya | -33.1167 | 26.66667 |
| chrysomya | -33.1167 | 26.66667 |
| chrysomya | -30.9667 | 25.61667 |
| chrysomya | -33.1167 | 26.66667 |
| chrysomya | -26.2    | 28.05    |
| chrysomya | -33.3333 | 26.51667 |
| chrysomya | -33.3167 | 26.53333 |
| chrysomya | -33.9833 | 25.6     |
| chrysomya | -33.9833 | 25.6     |
| chrysomya | -30.9667 | 25.61667 |
| chrysomya | -26.0667 | 30.11667 |
| chrysomya | -30.9667 | 25.61667 |
| chrysomya | -33.3167 | 26.53333 |
| chrysomya | -33.3167 | 26.53333 |
| chrysomya | -33.1167 | 26.66667 |
| chrysomya | -17.8639 | 31.02972 |

|           |          |          |
|-----------|----------|----------|
| chrysomya | -33.3167 | 26.53333 |
| chrysomya | -33.1167 | 26.66667 |
| chrysomya | -33.31   | 26.52675 |
| chrysomya | -33.5667 | 26.71667 |
| chrysomya | -33.3167 | 26.53333 |
| chrysomya | -33.1167 | 26.66667 |
| chrysomya | -33.3    | 26.51667 |
| chrysomya | -24.5167 | 28.71667 |
| chrysomya | -33.5667 | 26.71667 |
| chrysomya | -33.1167 | 26.66667 |
| chrysomya | -17.8639 | 31.02972 |
| chrysomya | -33.31   | 26.52675 |
| chrysomya | -33.3167 | 26.53333 |
| chrysomya | -33.3167 | 26.53333 |
| chrysomya | -33.3167 | 26.53333 |
| chrysomya | -33.1167 | 26.66667 |
| chrysomya | -33.3167 | 26.53333 |
| chrysomya | -33.3167 | 26.53333 |
| chrysomya | -33.1167 | 26.66667 |
| chrysomya | -33.1167 | 26.66667 |
| chrysomya | -33.3167 | 26.53333 |
| chrysomya | -30.9667 | 25.61667 |
| chrysomya | -33.9833 | 25.6     |
| chrysomya | -32.7833 | 26.83333 |
| chrysomya | -32.9333 | 28.03333 |
| chrysomya | -33.3167 | 26.51667 |
| chrysomya | -33.1167 | 26.66667 |
| chrysomya | -20.1167 | 28.58333 |
| chrysomya | -33.3    | 26.51667 |
| chrysomya | -33.5667 | 26.71667 |
| chrysomya | -30.9667 | 25.61667 |
| chrysomya | -24.8167 | 31.28333 |
| chrysomya | -33.3167 | 26.53333 |
| chrysomya | -33.3    | 26.51667 |
| chrysomya | -33.5667 | 26.71667 |
| chrysomya | -33.5667 | 26.71667 |
| chrysomya | -33.3167 | 26.53333 |
| chrysomya | -33.3167 | 26.51667 |
| chrysomya | -33.3167 | 26.53333 |
| chrysomya | -16.75   | 27       |
| chrysomya | -33.3167 | 26.53333 |
| chrysomya | -33.3167 | 26.53333 |
| chrysomya | -33.3167 | 26.53333 |
| chrysomya | -16.75   | 27       |
| chrysomya | -33.3167 | 26.53333 |
| chrysomya | -33.5667 | 26.71667 |
| chrysomya | -33.5667 | 26.71667 |

|           |          |          |
|-----------|----------|----------|
| chrysomya | -33.3167 | 26.53333 |
| chrysomya | -33.3    | 26.53333 |
| chrysomya | -33.3167 | 26.53333 |
| chrysomya | -33.3167 | 26.53333 |
| chrysomya | -33.1167 | 26.66667 |
| chrysomya | -33      | 27.88333 |
| chrysomya | -33.3167 | 26.53333 |
| chrysomya | -33.3167 | 26.53333 |
| chrysomya | -33.1167 | 26.66667 |
| chrysomya | -20.05   | 30.48333 |
| chrysomya | -20.15   | 28.58333 |
| chrysomya | -29.0103 | 29.86861 |
| chrysomya | -29.8906 | 30.97778 |
| chrysomya | -29.0103 | 29.86861 |
| chrysomya | -29.8906 | 30.97778 |
| chrysomya | -26.9911 | 32.82658 |
| chrysomya | -26.9636 | 32.81072 |
| chrysomya | -26.9911 | 32.82658 |
| chrysomya | -32.9667 | 17.9     |
| chrysomya | -33.3333 | 18.16667 |
| chrysomya | -18.05   | 13.38333 |
| chrysomya | -17.8333 | 31.03333 |
| chrysomya | -26.6833 | 16.25    |
| chrysomya | -32.625  | 20.375   |
| chrysomya | -29.9833 | 30.96667 |
| chrysomya | -31.875  | 23.875   |
| chrysomya | -33.9333 | 18.46667 |
| chrysomya | -22      | 15.6     |
| chrysomya | -32.9667 | 17.9     |
| chrysomya | -19.5    | 14.33333 |
| chrysomya | -19.1333 | 13.61667 |
| chrysomya | -33.3333 | 18.16667 |
| chrysomya | -32.9667 | 17.9     |
| chrysomya | -32.6667 | 21.51667 |
| chrysomya | -30.2167 | 26.53333 |
| chrysomya | 6.49583  | -74.3625 |
| chrysomya | 6.49583  | -74.3625 |
| chrysomya | 6.49583  | -74.3625 |
| chrysomya | 4.78361  | -75.6667 |
| chrysomya | 4.78361  | -75.6667 |
| chrysomya | 7.49467  | -73.3896 |

|           |          |          |
|-----------|----------|----------|
| chrysomya | 4.78361  | -75.6667 |
| chrysomya | 4.78361  | -75.6667 |
| chrysomya | 7.49467  | -73.3896 |
| chrysomya | 7.49467  | -73.3896 |
| chrysomya | 7.49467  | -73.3896 |
| chrysomya | 4.78361  | -75.6667 |
| chrysomya | 4.78361  | -75.6667 |
| chrysomya | 4.78361  | -75.6667 |
| chrysomya | 7.49467  | -73.3896 |
| chrysomya | 7.49467  | -73.3896 |
| chrysomya | 7.49467  | -73.3896 |
| chrysomya | 4.78361  | -75.6667 |
| chrysomya | 7.49467  | -73.3896 |
| chrysomya | 4.78361  | -75.6667 |
| chrysomya | 7.49467  | -73.3896 |
| chrysomya | 9.70586  | -75.6791 |
| chrysomya | 9.707353 | -75.6816 |
| chrysomya | 9.70586  | -75.6791 |
| chrysomya | 9.70586  | -75.6791 |
| chrysomya | 9.707353 | -75.6816 |
| chrysomya | 9.707353 | -75.6816 |
| chrysomya | 9.707353 | -75.6816 |
| chrysomya | 9.70586  | -75.6791 |
| chrysomya | 9.70586  | -75.6791 |
| chrysomya | 9.707353 | -75.6816 |
| chrysomya | 9.70586  | -75.6791 |

|           |          |          |
|-----------|----------|----------|
| chrysomya | 9.70586  | -75.6791 |
| chrysomya | 4.841667 | -74.3519 |
| chrysomya | 11.01667 | -74.8667 |
| chrysomya | 5.85029  | -75.7668 |
| chrysomya | 6.361017 | -75.0714 |

|           |          |          |
|-----------|----------|----------|
| chrysomya | 6.25769  | -75.6097 |
| chrysomya | 6.25769  | -75.6097 |
| chrysomya | 6.25769  | -75.6097 |
| chrysomya | 28.0981  | -17.346  |
| chrysomya | 28.09016 | -17.1124 |
| chrysomya | 28.0981  | -17.346  |
| chrysomya | 41.3937  | 2.1529   |
| chrysomya | 28.23282 | -16.6036 |
| chrysomya | 28.26212 | -16.5512 |
| chrysomya | 28.23211 | -16.6257 |
| chrysomya | 34.41667 | 73.28333 |
| chrysomya | 25.36667 | 68.36667 |
| chrysomya | 35.33333 | 71.93333 |
