# Supplementary material for: Evaluation of Climate Change Impacts on the Global Distribution of the Calliphorid Fly Chrysomya albiceps Using GIS
Source: MDPI journal article supplement (doi:10.3390/d14070578), 2022-07-20
Supplement: s1 [file s1]

| Layer 1 | Layer 2   | Full ID of L | Full ID of L | Pearson's r | Absolute value of R |
|---------|-----------|--------------|--------------|-------------|---------------------|
| 17      | 18 bio_18 | bio_19       |              | 0.374506    | 0.374506            |
| 16      | 18 bio_17 | bio_19       |              | 0.69853     | 0.69853             |
| 16      | 17 bio_17 | bio_18       |              | 0.580928    | 0.580928            |
| 15      | 18 bio_16 | bio_19       |              | 0.609991    | 0.609991            |
| 15      | 17 bio_16 | bio_18       |              | 0.761148    | 0.761148            |
| 15      | 16 bio_16 | bio_17       |              | 0.466359    | 0.466359            |
| 14      | 18 bio_15 | bio_19       |              | 0.67117     | 0.67117             |
| 14      | 17 bio_15 | bio_18       |              | 0.557614    | 0.557614            |
| 14      | 16 bio_15 | bio_17       |              | 0.993788    | 0.993788            |
| 14      | 15 bio_15 | bio_16       |              | 0.429049    | 0.429049            |
| 13      | 18 bio_14 | bio_19       |              | 0.67117     | 0.67117             |
| 13      | 17 bio_14 | bio_18       |              | 0.557614    | 0.557614            |
| 13      | 16 bio_14 | bio_17       |              | 0.993788    | 0.993788            |
| 13      | 15 bio_14 | bio_16       |              | 0.429049    | 0.429049            |
| 13      | 14 bio_14 | bio_15       |              | 1           | 1                   |
| 12      | 18 bio_13 | bio_19       |              | 0.584208    | 0.584208            |
| 12      | 17 bio_13 | bio_18       |              | 0.742413    | 0.742413            |
| 12      | 16 bio_13 | bio_17       |              | 0.429498    | 0.429498            |
| 12      | 15 bio_13 | bio_16       |              | 0.992615    | 0.992615            |
| 12      | 14 bio_13 | bio_15       |              | 0.392339    | 0.392339            |
| 12      | 13 bio_13 | bio_14       |              | 0.392339    | 0.392339            |
| 11      | 18 bio_12 | bio_19       |              | 0.753869    | 0.753869            |
| 11      | 17 bio_12 | bio_18       |              | 0.796836    | 0.796836            |
| 11      | 16 bio_12 | bio_17       |              | 0.743767    | 0.743767            |
| 11      | 15 bio_12 | bio_16       |              | 0.922165    | 0.922165            |
| 11      | 14 bio_12 | bio_15       |              | 0.70862     | 0.70862             |
| 11      | 13 bio_12 | bio_14       |              | 0.70862     | 0.70862             |
| 11      | 12 bio_12 | bio_13       |              | 0.896163    | 0.896163            |
| 10      | 18 bio_11 | bio_19       |              | 0.315888    | 0.315888            |
| 10      | 17 bio_11 | bio_18       |              | 0.265306    | 0.265306            |
| 10      | 16 bio_11 | bio_17       |              | 0.15256     | 0.15256             |
| 10      | 15 bio_11 | bio_16       |              | 0.504329    | 0.504329            |
| 10      | 14 bio_11 | bio_15       |              | 0.123146    | 0.123146            |
| 10      | 13 bio_11 | bio_14       |              | 0.123146    | 0.123146            |
| 10      | 12 bio_11 | bio_13       |              | 0.511218    | 0.511218            |
| 10      | 11 bio_11 | bio_12       |              | 0.4538      | 0.4538              |
| 9       | 18 bio_10 | bio_19       |              | 0.11205     | 0.11205             |
| 9       | 17 bio_10 | bio_18       |              | 0.100532    | 0.100532            |
| 9       | 16 bio_10 | bio_17       |              | -0.05417    | 0.054172            |
| 9       | 15 bio_10 | bio_16       |              | 0.286327    | 0.286327            |
| 9       | 14 bio_10 | bio_15       |              | -0.07535    | 0.075351            |
| 9       | 13 bio_10 | bio_14       |              | -0.07535    | 0.075351            |
| 9       | 12 bio_10 | bio_13       |              | 0.303114    | 0.303114            |
| 9       | 11 bio_10 | bio_12       |              | 0.199822    | 0.199822            |
| 9       | 10 bio_10 | bio_11       |              | 0.847842    | 0.847842            |
| 8       | 18 bio_9  | bio_19       |              | 0.307043    | 0.307043            |

|   |          |        |          |          |
|---|----------|--------|----------|----------|
| 8 | 17 bio_9 | bio_18 | 0.152563 | 0.152563 |
| 8 | 16 bio_9 | bio_17 | 0.134592 | 0.134592 |
| 8 | 15 bio_9 | bio_16 | 0.40789  | 0.40789  |
| 8 | 14 bio_9 | bio_15 | 0.107479 | 0.107479 |
| 8 | 13 bio_9 | bio_14 | 0.107479 | 0.107479 |
| 8 | 12 bio_9 | bio_13 | 0.413302 | 0.413302 |
| 8 | 11 bio_9 | bio_12 | 0.374582 | 0.374582 |
| 8 | 10 bio_9 | bio_11 | 0.949983 | 0.949983 |
| 8 | 9 bio_9  | bio_10 | 0.831251 | 0.831251 |
| 7 | 18 bio_8 | bio_19 | 0.073949 | 0.073949 |
| 7 | 17 bio_8 | bio_18 | 0.254073 | 0.254073 |
| 7 | 16 bio_8 | bio_17 | -0.04362 | 0.043622 |
| 7 | 15 bio_8 | bio_16 | 0.352129 | 0.352129 |
| 7 | 14 bio_8 | bio_15 | -0.06601 | 0.066014 |
| 7 | 13 bio_8 | bio_14 | -0.06601 | 0.066014 |
| 7 | 12 bio_8 | bio_13 | 0.370054 | 0.370054 |
| 7 | 11 bio_8 | bio_12 | 0.251716 | 0.251716 |
| 7 | 10 bio_8 | bio_11 | 0.731076 | 0.731076 |
| 7 | 9 bio_8  | bio_10 | 0.865048 | 0.865048 |
| 7 | 8 bio_8  | bio_9  | 0.609321 | 0.609321 |
| 6 | 18 bio_7 | bio_19 | -0.47528 | 0.475278 |
| 6 | 17 bio_7 | bio_18 | -0.38914 | 0.389141 |
| 6 | 16 bio_7 | bio_17 | -0.37534 | 0.375337 |
| 6 | 15 bio_7 | bio_16 | -0.59476 | 0.594762 |
| 6 | 14 bio_7 | bio_15 | -0.34565 | 0.345647 |
| 6 | 13 bio_7 | bio_14 | -0.34565 | 0.345647 |
| 6 | 12 bio_7 | bio_13 | -0.58874 | 0.588739 |
| 6 | 11 bio_7 | bio_12 | -0.61496 | 0.614965 |
| 6 | 10 bio_7 | bio_11 | -0.84693 | 0.846926 |
| 6 | 9 bio_7  | bio_10 | -0.45451 | 0.454513 |
| 6 | 8 bio_7  | bio_9  | -0.78123 | 0.781227 |
| 6 | 7 bio_7  | bio_8  | -0.38729 | 0.387287 |
| 5 | 18 bio_6 | bio_19 | 0.356557 | 0.356557 |
| 5 | 17 bio_6 | bio_18 | 0.282138 | 0.282138 |
| 5 | 16 bio_6 | bio_17 | 0.196829 | 0.196829 |
| 5 | 15 bio_6 | bio_16 | 0.521814 | 0.521814 |
| 5 | 14 bio_6 | bio_15 | 0.166661 | 0.166661 |
| 5 | 13 bio_6 | bio_14 | 0.166661 | 0.166661 |
| 5 | 12 bio_6 | bio_13 | 0.52682  | 0.52682  |
| 5 | 11 bio_6 | bio_12 | 0.486377 | 0.486377 |
| 5 | 10 bio_6 | bio_11 | 0.996005 | 0.996005 |
| 5 | 9 bio_6  | bio_10 | 0.824798 | 0.824798 |
| 5 | 8 bio_6  | bio_9  | 0.948706 | 0.948706 |
| 5 | 7 bio_6  | bio_8  | 0.704182 | 0.704182 |
| 5 | 6 bio_6  | bio_7  | -0.87585 | 0.87585  |
| 4 | 18 bio_5 | bio_19 | 0.054833 | 0.054833 |
| 4 | 17 bio_5 | bio_18 | 0.025942 | 0.025942 |

|   |          |        |          |          |
|---|----------|--------|----------|----------|
| 4 | 16 bio_5 | bio_17 | -0.12065 | 0.12065  |
| 4 | 15 bio_5 | bio_16 | 0.214902 | 0.214902 |
| 4 | 14 bio_5 | bio_15 | -0.13935 | 0.139347 |
| 4 | 13 bio_5 | bio_14 | -0.13935 | 0.139347 |
| 4 | 12 bio_5 | bio_13 | 0.232634 | 0.232634 |
| 4 | 11 bio_5 | bio_12 | 0.11936  | 0.11936  |
| 4 | 10 bio_5 | bio_11 | 0.795358 | 0.795358 |
| 4 | 9 bio_5  | bio_10 | 0.988386 | 0.988386 |
| 4 | 8 bio_5  | bio_9  | 0.791626 | 0.791626 |
| 4 | 7 bio_5  | bio_8  | 0.844862 | 0.844862 |
| 4 | 6 bio_5  | bio_7  | -0.35843 | 0.358426 |
| 4 | 5 bio_5  | bio_6  | 0.764447 | 0.764447 |
| 3 | 18 bio_4 | bio_19 | -0.40461 | 0.404611 |
| 3 | 17 bio_4 | bio_18 | -0.3366  | 0.336603 |
| 3 | 16 bio_4 | bio_17 | -0.27478 | 0.274785 |
| 3 | 15 bio_4 | bio_16 | -0.56867 | 0.568669 |
| 3 | 14 bio_4 | bio_15 | -0.24486 | 0.244857 |
| 3 | 13 bio_4 | bio_14 | -0.24486 | 0.244857 |
| 3 | 12 bio_4 | bio_13 | -0.56722 | 0.567221 |
| 3 | 11 bio_4 | bio_12 | -0.55374 | 0.553744 |
| 3 | 10 bio_4 | bio_11 | -0.92573 | 0.92573  |
| 3 | 9 bio_4  | bio_10 | -0.58473 | 0.58473  |
| 3 | 8 bio_4  | bio_9  | -0.8608  | 0.860803 |
| 3 | 7 bio_4  | bio_8  | -0.50138 | 0.501379 |
| 3 | 6 bio_4  | bio_7  | 0.971165 | 0.971165 |
| 3 | 5 bio_4  | bio_6  | -0.93584 | 0.935836 |
| 3 | 4 bio_4  | bio_5  | -0.51299 | 0.512991 |
| 2 | 18 bio_3 | bio_19 | 0.430679 | 0.430679 |
| 2 | 17 bio_3 | bio_18 | 0.352778 | 0.352778 |
| 2 | 16 bio_3 | bio_17 | 0.254811 | 0.254811 |
| 2 | 15 bio_3 | bio_16 | 0.580976 | 0.580976 |
| 2 | 14 bio_3 | bio_15 | 0.221026 | 0.221026 |
| 2 | 13 bio_3 | bio_14 | 0.221026 | 0.221026 |
| 2 | 12 bio_3 | bio_13 | 0.580627 | 0.580627 |
| 2 | 11 bio_3 | bio_12 | 0.564268 | 0.564268 |
| 2 | 10 bio_3 | bio_11 | 0.890693 | 0.890693 |
| 2 | 9 bio_3  | bio_10 | 0.659754 | 0.659754 |
| 2 | 8 bio_3  | bio_9  | 0.808222 | 0.808222 |
| 2 | 7 bio_3  | bio_8  | 0.637936 | 0.637936 |
| 2 | 6 bio_3  | bio_7  | -0.82642 | 0.826419 |
| 2 | 5 bio_3  | bio_6  | 0.887705 | 0.887705 |
| 2 | 4 bio_3  | bio_5  | 0.613248 | 0.613248 |
| 2 | 3 bio_3  | bio_4  | -0.89144 | 0.891443 |
| 1 | 18 bio_2 | bio_19 | -0.24223 | 0.242234 |
| 1 | 17 bio_2 | bio_18 | -0.20221 | 0.202206 |
| 1 | 16 bio_2 | bio_17 | -0.37167 | 0.371668 |
| 1 | 15 bio_2 | bio_16 | -0.12436 | 0.124356 |

|   |          |        |          |          |
|---|----------|--------|----------|----------|
| 1 | 14 bio_2 | bio_15 | -0.37462 | 0.37462  |
| 1 | 13 bio_2 | bio_14 | -0.37462 | 0.37462  |
| 1 | 12 bio_2 | bio_13 | -0.10414 | 0.104141 |
| 1 | 11 bio_2 | bio_12 | -0.24488 | 0.244885 |
| 1 | 10 bio_2 | bio_11 | 0.42557  | 0.42557  |
| 1 | 9 bio_2  | bio_10 | 0.621295 | 0.621295 |
| 1 | 8 bio_2  | bio_9  | 0.438617 | 0.438617 |
| 1 | 7 bio_2  | bio_8  | 0.532916 | 0.532916 |
| 1 | 6 bio_2  | bio_7  | 0.015384 | 0.015384 |
| 1 | 5 bio_2  | bio_6  | 0.354887 | 0.354887 |
| 1 | 4 bio_2  | bio_5  | 0.707079 | 0.707079 |
| 1 | 3 bio_2  | bio_4  | -0.2099  | 0.209899 |
| 1 | 2 bio_2  | bio_3  | 0.864785 | 0.864785 |
| 0 | 18 bio_1 | bio_19 | 0.248916 | 0.248916 |
| 0 | 17 bio_1 | bio_18 | 0.223736 | 0.223736 |
| 0 | 16 bio_1 | bio_17 | 0.082851 | 0.082851 |
| 0 | 15 bio_1 | bio_16 | 0.444554 | 0.444554 |
| 0 | 14 bio_1 | bio_15 | 0.055368 | 0.055368 |
| 0 | 13 bio_1 | bio_14 | 0.055368 | 0.055368 |
| 0 | 12 bio_1 | bio_13 | 0.455195 | 0.455195 |
| 0 | 11 bio_1 | bio_12 | 0.378449 | 0.378449 |
| 0 | 10 bio_1 | bio_11 | 0.979756 | 0.979756 |
| 0 | 9 bio_1  | bio_10 | 0.93509  | 0.93509  |
| 0 | 8 bio_1  | bio_9  | 0.938065 | 0.938065 |
| 0 | 7 bio_1  | bio_8  | 0.8119   | 0.8119   |
| 0 | 6 bio_1  | bio_7  | -0.73042 | 0.730416 |
| 0 | 5 bio_1  | bio_6  | 0.967553 | 0.967553 |
| 0 | 4 bio_1  | bio_5  | 0.895965 | 0.895965 |
| 0 | 3 bio_1  | bio_4  | -0.83296 | 0.832961 |
| 0 | 2 bio_1  | bio_3  | 0.838626 | 0.838626 |
| 0 | 1 bio_1  | bio_2  | 0.520706 | 0.520706 |
