# Supplementary material for: Evaluation of Climate Change Impacts on the Global Distribution of the Calliphorid Fly Chrysomya albiceps Using GIS
Source: MDPI journal article supplement (doi:10.3390/d14070578), 2022-07-20
Supplement: s1 [file s1]

## Reduced correlated covariates

bio\_14

bio\_12

bio\_7

bio\_2

bio\_1
